# Supplementary material for: Clinical and Radiographic Outcomes of Single Implant-Supported Zirconia Crowns Following a Digital and Conventional Workflow: Four-Year Follow-Up of a Randomized Controlled Clinical Trial
Source: MDPI journal article supplement (doi:10.3390/jcm13020432), 2024-01-12
Supplement: s1 [file s1]

## **File S1. Results following an intention-to-treat analysis**

Distribution according to initial treatment allocation:

Analyzed: digital workflow (n=15), conventional workflow (n=12)

| <i>3.3 Patient's perception (questionnaire)</i>                                              |  |         |  |
|----------------------------------------------------------------------------------------------|--|---------|--|
| Question                                                                                     |  | p-value |  |
| <b>(1) Preference of impression technique</b>                                                |  | 0.715   |  |
| <b>(2) Satisfaction with implant crown's esthetics</b>                                       |  | 0.444   |  |
| <b>(3) Perform future impressions digital</b>                                                |  | 0.454   |  |
| <b>(4) Nausea during conventional impressions (NRS)</b>                                      |  | 0.643   |  |
| <b>(5) Discomfort of clinical step(s) (from implant placement to insertion of the crown)</b> |  | 0.388   |  |
| <b>(6) Importance of single posterior tooth gap rehabilitation (NRS)</b>                     |  | 0.811   |  |
| <b>(7) Recommendation of implant-supported zirconia crowns to friends</b>                    |  | 0.444   |  |
| <b>(8) Type of impression technique recommended to friends</b>                               |  | 0.108   |  |

| <i>3.4 Peri-implant health and technical complications</i> |                                    |                                    |         |
|------------------------------------------------------------|------------------------------------|------------------------------------|---------|
| Parameter                                                  | Digital Workflow                   | Conventional Workflow              | p-value |
| <b>BoP (%)</b>                                             | -                                  | -                                  | 1.000   |
| <b>Plaque (%)</b>                                          | -                                  | -                                  | 1.000   |
| <b>PPD</b>                                                 | 2.68 ± 0.77 mm<br>(range: 1.0-6.0) | 2.52 ± 0.53 mm<br>(range: 1.0-5.0) | 0.990   |

| <i>3.5 Marginal bone level</i>                                         |                  |                       |         |
|------------------------------------------------------------------------|------------------|-----------------------|---------|
| Parameter                                                              | Digital Workflow | Conventional Workflow | p-value |
| <b>MBL (Ti)</b>                                                        | -0.11 ± 0.26 mm  | 0.16 ± 0.43 mm        | -       |
| <b>MBL (T<sub>Last</sub>)</b>                                          | -0.14 ± 0.3 mm   | -0.21 ± 0.55 mm       | -       |
| <b>MBL (T<sub>1</sub>-T<sub>Last</sub>)</b>                            | 0.03 ± 0.14 mm   | 0.37 ± 0.59 mm        | p=0.105 |
| <b>MBL (T<sub>1</sub>-T<sub>Last</sub>)<sub>Digital Workflow</sub></b> | -                | -                     | p=0.365 |
| <b>MBL (T<sub>1</sub>-T<sub>Last</sub>)<sub>Conv. Workflow</sub></b>   | -                | -                     | p=0.09  |

| <i>3.6 Functional Implant Prosthodontic Score (FIPS)</i> |                             |                              |         |
|----------------------------------------------------------|-----------------------------|------------------------------|---------|
| Paramter                                                 | Digital Workflow            | Conventional Workflow        | p-value |
| <b>FIPS Score (mean)</b>                                 | 8.4 ± 1.18<br>(range: 6-10) | 7.75 ± 1.55<br>(range: 5-10) | p=0.315 |
